# Supplementary material for: Oxocomplexes of U(vi) with 8-hydroxyquinoline-5-sulfonate in solution: structural studies and photophysical behaviour
Source: Royal Society of Chemistry journal article supplement (doi:10.1039/c7dt01324h), 2017-01-01
Supplement: c7dt01324h1.pdf [file c7dt01324h1.pdf]

## Electronic supplementary information (ESI)

### Oxocomplexes of U(VI) with 8-Hydroxyquinoline-5-Sulfonate in Solution: Structural Studies and Photophysical Behaviour<sup>†</sup>

M. Luísa Ramos, Licinia L. G. Justino, Rui Barata, Telma Costa, Bernardo A. Nogueira,  
Rui Fausto, Hugh D. Burrows

*Centro de Química and Department of Chemistry, University of Coimbra, 3004-535  
Coimbra, Portugal*

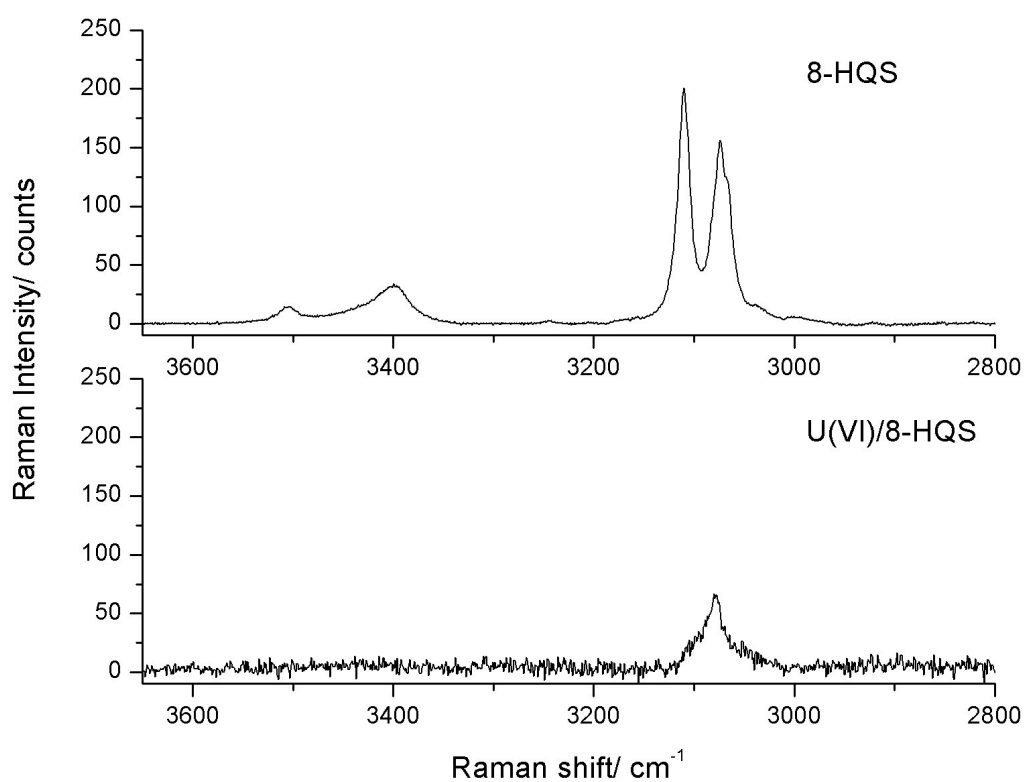

Fig. S1 - Raman spectra of 2800 – 3600 cm<sup>-1</sup> region for 8-HQS and U(VI)/8-HQS

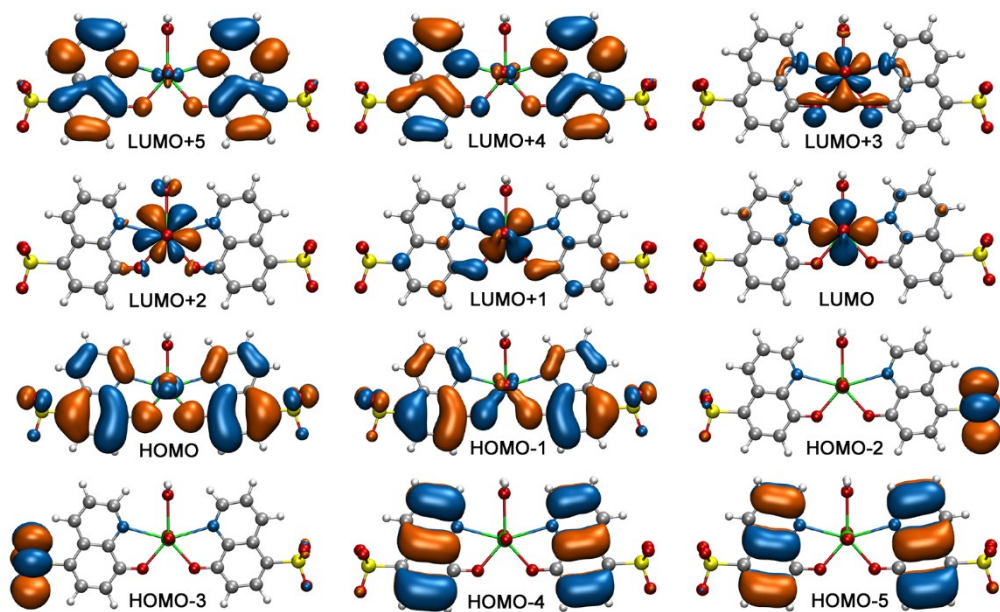

**Fig. S2** - Orbital density distribution for the orbitals from HOMO-5 to LUMO+5 calculated at the DFT/B3LYP level of theory for the  $[U(8-HQS)_2H_2O]^{2-}$  complex.
